# Supplementary material for: The mystery of membrane organization: composition, regulation and roles of lipid rafts
Source: Springer Nature journal article supplement (doi:10.1038/nrm.2017.16), 2017-03-30
Supplement: 41580_2017_BFnrm201716_MOESM445_ESM.pdf [file 41580_2017_BFnrm201716_MOESM445_ESM.pdf]

## Supplementary Box 1 | Rafts in the tree of life

Although the general fluid bilayer organization of biological membranes is nearly completely conserved throughout the kingdoms of life, the specific lipid and protein compositions of cellular membranes vary dramatically between various life forms. Recent findings suggest that membrane domains are prevalent throughout the evolutionary tree, suggesting that lateral heterogeneity is a broad organizing principle for biological membranes.

*Rafts in prokaryotes* – Most prokaryotes do not produce cholesterol or sphingomyelin, instead relying on sterol analogs<sup>1</sup> or Lipid A<sup>2</sup> that may function as physical surrogates of key raft constituents. Hopanoids, for instance, fluidize the bacterial membrane and drive formation of ordered membrane domains<sup>2</sup>. *Borrelia*, a genus of bacteria obtaining cholesterol from the host, shows distinct domains of high lipid order<sup>3</sup> that are required for bactericidal activity by host factors<sup>4</sup>. Comparing the DRM proteome of *Borrelia*<sup>5</sup> with that of mammalian cells has provided insight in how membrane domains composition has evolved from prokaryotes to eukaryotes. Membrane heterogeneity is specifically maintained in distinct parts of the bacterial cells. For instance, bacterial flagella are rich in saturated and depleted with unsaturated lipids, which supports the formation of ordered membrane environments in the flagella and this environment is vital for its function<sup>6</sup>.

*Rafts in fungi and plants* – Fungal membranes possess broadly similar lipid classes to those found in metazoans. For instance, the dominant sterol is ergosterol<sup>7</sup>, which like cholesterol has the ability to interact with sphingolipids and form ordered membrane domains<sup>8</sup>. Such domains have been implicated in several processes, including growth and death of the yeast cell<sup>9</sup>. In plants, on the other hand, a complex mixture of sterols (usually called phytosterols) is present and interactions of these sterols with lipids (mostly ceramides) and proteins can lead to membrane structuring<sup>10</sup>.

*Rafts in animals* – As highlighted before, plasma membranes of mammalian cells are marvellously capable of undergoing microscopic phase separation in the absence of cortical actin cytoskeleton<sup>11</sup>. Recent labelling and observation technologies have also enabled us to probe lateral heterogeneity in the plasma membrane of live mammalian cells<sup>12-14</sup>. However, it is not the only structure accommodating domains. Very surprisingly, most direct evidence of liquid-liquid phase separation in live cells occurs in vacuoles<sup>15</sup>. Mitochondria or mitochondria-associated membranes<sup>16</sup> and exosomes<sup>17</sup> have recently been shown to be enriched in DRMs, as well.

- 1 Saenz, J. P. *et al.* Hopanoids as functional analogues of cholesterol in bacterial membranes. *Proc Natl Acad Sci U S A* **112**, 11971-11976 (2015).
- 2 Saenz, J. P., Sezgin, E., Schwille, P. & Simons, K. Functional convergence of hopanoids and sterols in membrane ordering. *Proceedings of the National Academy of Sciences of the United States of America* **109**, 14236-14240 (2012).
- 3 LaRocca, T. J. *et al.* Proving Lipid Rafts Exist: Membrane Domains in the Prokaryote *Borrelia burgdorferi* Have the Same Properties as Eukaryotic Lipid Rafts. *Plos Pathogens* **9** (2013).
- 4 LaRocca, T. J. *et al.* Cholesterol lipids of *Borrelia burgdorferi* form lipid rafts and are required for the bactericidal activity of a complement-independent antibody. *Cell host & microbe* **8**, 331-342 (2010).
- 5 Toledo, A., Perez, A., Coleman, J. L. & Benach, J. L. The lipid raft proteome of *Borrelia burgdorferi*. *Proteomics* **15**, 3662-3675 (2015).

- 6 Serricchio, M. *et al.* Flagellar membranes are rich in raft-forming phospholipids. *Biology open* **4**, 1143-1153 (2015).
- 7 Ejsing, C. S. *et al.* Global analysis of the yeast lipidome by quantitative shotgun mass spectrometry. *Proc Natl Acad Sci U S A* **106**, 2136-2141 (2009).
- 8 Klose, C. *et al.* Yeast lipids can phase-separate into micrometer-scale membrane domains. *J Biol Chem* **285**, 30224-30232 (2010).
- 9 Mollinedo, F. Lipid raft involvement in yeast cell growth and death. *Frontiers in oncology* **2**, 140 (2012).
- 10 Zauber, H., Burgos, A., Garapati, P. & Schulze, W. X. Plasma membrane lipid-protein interactions affect signaling processes in sterol-biosynthesis mutants in *Arabidopsis thaliana*. *Frontiers in plant science* **5**, 78 (2014).
- 11 Baumgart, T. *et al.* Large-scale fluid/fluid phase separation of proteins and lipids in giant plasma membrane vesicles. *Proc Natl Acad Sci U S A* **104**, 3165-3170 (2007).
- 12 Eggeling, C. *et al.* Direct observation of the nanoscale dynamics of membrane lipids in a living cell. *Nature* **457**, 1159-1162 (2009).
- 13 Owen, D. M., Williamson, D. J., Magenau, A. & Gaus, K. Sub-resolution lipid domains exist in the plasma membrane and regulate protein diffusion and distribution. *Nature Communications* **3** (2012).
- 14 Sanchez, S. A., Triccerri, M. A. & Gratton, E. Laurdan generalized polarization fluctuations measures membrane packing micro-heterogeneity in vivo. *Proceedings of the National Academy of Sciences of the United States of America* **109**, 7314-7319 (2012).
- 15 Toulmay, A. & Prinz, W. A. Direct imaging reveals stable, micrometer-scale lipid domains that segregate proteins in live cells. *Journal of Cell Biology* **202**, 35-44 (2013).
- 16 Poston, C. N., Duong, E., Cao, Y. & Bazemore-Walker, C. R. Proteomic analysis of lipid raft-enriched membranes isolated from internal organelles. *Biochemical and biophysical research communications* **415**, 355-360 (2011).
- 17 Dubois, L., Ronquist, K. K., Ek, B., Ronquist, G. & Larsson, A. Proteomic Profiling of Detergent Resistant Membranes (Lipid Rafts) of Protasomes. *Molecular & cellular proteomics : MCP* **14**, 3015-3022 (2015).
